# Supplementary material
Source: publisher figshare collection journal article supplement (https://tandf.figshare.com/ndownloader/files/17388113)
Supplement: Supplementary file 1 [file 17388113]

## Effect of a commercial anionic dietary supplement on urinary pH and concentrations of electrolytes and pH in blood of horses

EA Nelson<sup>\*†§</sup>, LC Sanchez<sup>\*</sup>, MF Mallicote<sup>\*</sup>, LK Warren<sup>†</sup>, AM Robelen<sup>\*#</sup>, SM Reuss<sup>\*¥</sup>

\* Department of Large Animal Clinical Sciences, College of Veterinary Medicine, University of Florida, Gainesville, FL, USA.

† Department of Animal Sciences, University of Florida, Gainesville, FL, USA

‡ Current Address: San Luis Rey Equine Hospital, Bonsall, CA, USA

# Current address: Care First Animal Hospital, Cary, NC, USA

¥ Current address: Boehringer Ingelheim Animal Health, Duluth, GA, USA.

§ Author for correspondence. Email: [nelson@slreh.com](mailto:nelson@slreh.com)

### Supplementary Table 1. Calculation of dietary cation-anion difference (DCAD) in feeds.

Shorthand equation for DCAD (mEq/kg DM):

$$\text{DCAD} = (\% \text{Na} * 435) + (\% \text{K} * 256) - (\% \text{Cl} * 282) - (\% \text{S} * 624)$$

|                 |        |       |           |      |     |       |     |      |     |
|-----------------|--------|-------|-----------|------|-----|-------|-----|------|-----|
| <b>TIZWHIZ</b>  | DCAD = | 0.376 | 435       | 1.1  | 256 | 0.53  | 282 | 0.31 | 624 |
|                 | DCAD = | 102.3 | mEq/kg DM |      |     |       |     |      |     |
| <b>SOYCHLOR</b> | DCAD = | 0.042 | 435       | 0.61 | 256 | 10.32 | 282 | 0.43 | 624 |
|                 | DCAD = | -3004 | mEq/kg DM |      |     |       |     |      |     |
| <b>MIX HAY</b>  | DCAD = | 0.053 | 435       | 1.84 | 256 | 0.85  | 282 | 0.27 | 624 |
|                 | DCAD = | 85.92 | mEq/kg DM |      |     |       |     |      |     |

**Supplementary table 2. Calculations used to estimate the dietary cation-anion difference (DCAB) of different diets.**
**Control Diet - TizWiz + Mix hay**
**OPTION 1: Diet in Proposal (1.5% BW as hay + 0.25% BW as grain)**

|         | % BW<br>(DM basis) | % of total<br>intake | DCAB of<br>feed<br>(mEq/kg<br>DM) | DCAB of<br>total diet<br>(mEq/kg<br>DM) | %DM in<br>feed | Amount to<br>feed<br>(% BW,<br>as-fed<br>basis) | Example calculation of<br>amount to feed for 500 kg<br>horse |
|---------|--------------------|----------------------|-----------------------------------|-----------------------------------------|----------------|-------------------------------------------------|--------------------------------------------------------------|
| Mix Hay | 1.50               | 85.71                | 85.92                             | 73.65                                   | 80.2           | <b>1.87</b>                                     | 9.35 kg/d                                                    |
| TizWiz  | 0.25               | 14.29                | 102.26                            | 14.61                                   | 89.30          | <b>0.28</b>                                     | 1.40 kg/d                                                    |
| Total   | 1.75               | 100.00               |                                   | <b>88.25</b>                            |                |                                                 |                                                              |

**0 mEq diet - TizWiz + Mix hay**
**OPTION 1: Diet in Proposal (1.5% BW as hay + 0.25% BW as grain)**

|          | % BW<br>(DM basis) | % of total<br>intake | DCAB of<br>feed<br>(mEq/kg<br>DM) | DCAB of<br>total diet<br>(mEq/kg<br>DM) | %DM in<br>feed | Amount to<br>feed<br>(% BW,<br>as-fed<br>basis) | Example calculation of<br>amount to feed for 500 kg<br>horse |
|----------|--------------------|----------------------|-----------------------------------|-----------------------------------------|----------------|-------------------------------------------------|--------------------------------------------------------------|
| Mix Hay  | 1.50               | 83.27                | 85.92                             | 71.54                                   | 80.2           | <b>1.87</b>                                     | 9.35 kg/d                                                    |
| TizWiz   | 0.25               | 13.88                | 102.26                            | 14.19                                   | 89.30          | <b>0.28</b>                                     | 1.40 kg/d                                                    |
| Soychlor | 0.0514             | 2.85                 | -3006                             | -85.77                                  | 88.60          | <b>0.0580</b>                                   | 290.07 grams/d                                               |
| Total    | 1.801              | 100.00               |                                   | <b>-0.04</b>                            |                |                                                 |                                                              |

**-40 mEq diet - TizWiz + Mix hay**
**OPTION 1: Diet in Proposal (1.5% BW as hay + 0.25% BW as grain)**

|          | % BW<br>(DM basis) | % of total<br>intake | DCAB of<br>feed<br>(mEq/kg<br>DM) | DCAB of<br>total diet<br>(mEq/kg<br>DM) | %DM in<br>feed | Amount to<br>feed<br>(% BW,<br>as-fed<br>basis) | Example calculation of<br>amount to feed for 500 kg<br>horse |
|----------|--------------------|----------------------|-----------------------------------|-----------------------------------------|----------------|-------------------------------------------------|--------------------------------------------------------------|
| Mix Hay  | 1.50               | 82.15                | 85.92                             | 70.58                                   | 80.2           | <b>1.87</b>                                     | 9.35 kg/d                                                    |
| TizWiz   | 0.25               | 13.69                | 102.26                            | 14.00                                   | 89.30          | <b>0.28</b>                                     | 1.40 kg/d                                                    |
| Soychlor | 0.076              | 4.16                 | -3006                             | -125.11                                 | 88.60          | <b>0.0858</b>                                   | 428.89 grams/d                                               |
| Total    | 1.826              | 100.00               |                                   | <b>-40.53</b>                           |                |                                                 |                                                              |
